# Supplementary material
Source: MDPI journal article supplement (https://www.mdpi.com/2076-3417/13/14/8106)
Supplement: s1 [file s1]

## Supplementary Materials

**Table S1.** Specification of chemicals used in the study.

| Component                 | CAS Reg. No. | Suppliers                                                 | Purity                              |
|---------------------------|--------------|-----------------------------------------------------------|-------------------------------------|
| Graphene oxide dispersion | 7440-44-0    | Jiangsu Xianfeng Nano Material Technology Co., Ltd. China | 0.5mg/ml, solvent: H <sub>2</sub> O |
| Sodium borohydride        | 16940-66-2   | Sigma Aldrich, China                                      | Analytical grade                    |
| Methyl blue               | 28983-56-4   | Sigma Aldrich, China                                      | Analytical grade                    |

**Table S2.** Comparison of maximum adsorption capacity for MB sorption with other adsorbents.

| Adsorbent        | Adsorption capacity (mgg <sup>-1</sup> ) | Time (min) | References |
|------------------|------------------------------------------|------------|------------|
| Graphite oxide   | 351.1                                    | 60         | [56]       |
| GO               | 403.3                                    | 60         | [57]       |
| GO               | 243.90                                   | 300        | [58]       |
| Carbon nanotubes | 188.68                                   | 300        | [58]       |
| GO aerogel       | 480.76                                   | 360        | [59]       |
| 3D GO sponge     | 397                                      | 20         | [60]       |
| 3D RGO hydrogel  | 7.85                                     | 120        | [61]       |
| RGO              | 204.08                                   | 255        | [62]       |
| RGO              | 100                                      | 60         | [63]       |
| GO               | 714                                      | 100        | [64]       |
| Porous RGO       | 313                                      | 180        | [65]       |
| APG              | 821.05                                   | 120        | This work  |

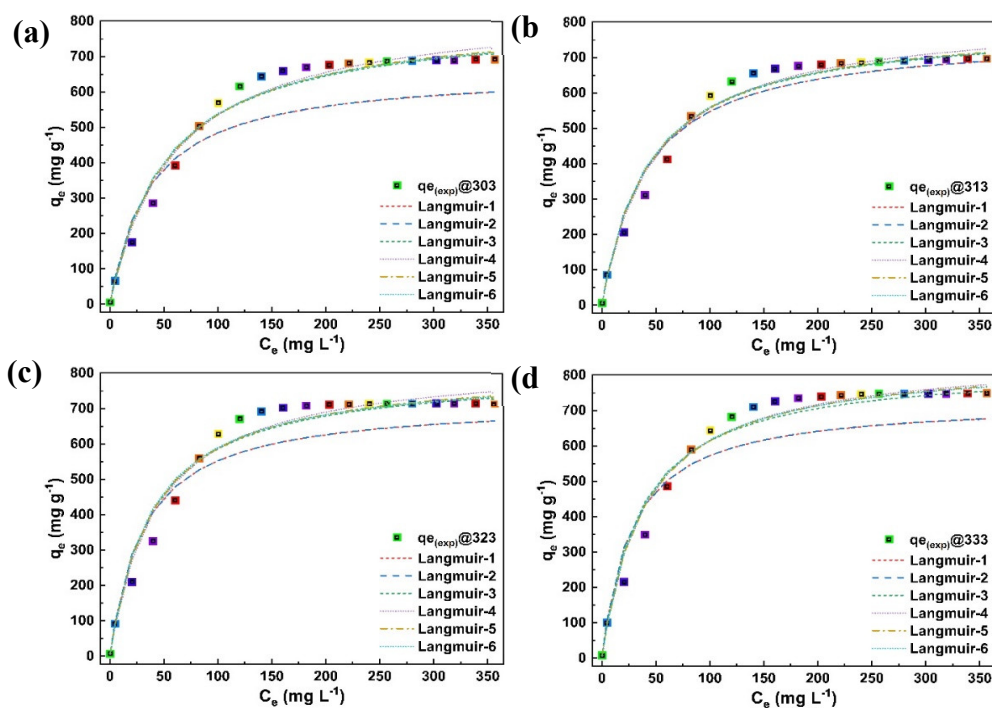

**Figure S1.** Linear forms of Langmuir isotherm models for sorption of MB on AG at (a) 303, (b) 313, (c) 323 and (d) 333 K.

**Table S3.** Description of error functions.

| Function name                | Abbreviation | Expression                                   | Interpretation                                                                                                 |
|------------------------------|--------------|----------------------------------------------|----------------------------------------------------------------------------------------------------------------|
| Sum of Squares of the Errors | SSE          | $SSE = \sum_{i=1}^n (q_{cal} - q_{exp})_i^2$ | The most widely used error function is SSE. The underlying features of this function is that when liquid-phase |

|                                        |        |                                                                                                           |                                                                                                                                                                                                                |
|----------------------------------------|--------|-----------------------------------------------------------------------------------------------------------|----------------------------------------------------------------------------------------------------------------------------------------------------------------------------------------------------------------|
| Sum of the Absolute Errors             | EABS   | $EABS = \sum_{i=1}^n  q_{cal} - q_{exp} _i$                                                               | concentration with time increases, the errors' square also grows results the better fit of the isotherm parameters.                                                                                            |
| Average Relative Error                 | ARE    | $ARE = \frac{100}{n} \sum_{i=1}^n \left  \frac{q_{e,cal} - q_{e,exp}}{q_{e,exp}} \right _i$               | EABS is similar to the SSE. Thus, the same disadvantage as for SSE, namely better fit at high pressure, is observed.                                                                                           |
| Marquardt's Percent Standard Deviation | MPSD   | $MPSD = 100 \sqrt{\frac{1}{n-p} \sum_{i=1}^n \left( \frac{q_{e,cal} - q_{e,exp}}{q_{e,exp}} \right)^2}_i$ | ARE is a function minimizing the fractional error distribution across the entire range of independent variables.                                                                                               |
| Hybrid Fractional Error                | HYBRID | $HYBRID = \frac{100}{n-p} \sum_{i=1}^n \left[ \frac{(q_{e,exp} - q_{e,cal})^2}{q_{e,exp}} \right]_i$      | MPSD is a function based on error distribution of geometric mean of a system's degree of freedom.                                                                                                              |
|                                        |        |                                                                                                           | In comparison to SSE, the HYBRID enhances the fit for low concentrations. The function features the degrees of freedom of the system namely, the number of defining constraints and the tentative data points. |

#### Method of SNE calculation

1. Calculation of all parameters for a particular isotherm model.
2. Error calculations for each of all desired error functions in separate spreadsheets.
3. The solver add-in minimization (maximization in the case of  $R^2$ ) of an as-prepared error function.
4. Repeating the above steps (1-3) for all isotherm models and error functions.
5. Orthogonal tabulation of the data obtained for each isotherm model and identifying the maximum value for each data set of a particular error function.
6. Dividing the other error data by the maximum value within the error function.
7. The summation of the obtained residuals for each error function is the normalized error.

**Table S4.** Error analysis of Langmuir isotherm model at four different temperatures for MB adsorption on AG.

| Parameters | SSE             | ARE             | EABS            | HYBRID          | MPSD              |
|------------|-----------------|-----------------|-----------------|-----------------|-------------------|
| <b>303</b> |                 |                 |                 |                 |                   |
| $q_e$      | 849.368         | 833.6314        | 829.4236        | 874.4191        | 847.9420731       |
| $K_L$      | 0.016863        | 0.018057        | 0.01859         | 0.014807        | 0.016284335       |
| SSE        | <b>18557.58</b> | 19025.07        | 19410.34        | 20147.6         | 19341.45123       |
| ARE        | 6.80083         | <b>6.537616</b> | 6.632709        | 7.307438        | 6.988912143       |
| EABS       | 509.0316        | 493.7912        | <b>489.8041</b> | 544.3506        | 523.3686072       |
| HYBRID     | 247.709         | 278.85          | 298.6454        | <b>221.2182</b> | 234.8043412       |
| MPSD       | 10.13197        | 10.54165        | 10.88628        | 10.24976        | <b>9.97822198</b> |
| <b>SNE</b> | <b>4.547023</b> | 4.648115        | 4.770868        | 4.682269        | 4.580671772       |
| <b>313</b> |                 |                 |                 |                 |                   |
| $q_e$      | 831.9712        | 799.9976        | 797.7316        | 845.5335        | 816.0993          |
| $K_L$      | 0.019751        | 0.023931        | 0.024423        | 0.018143        | 0.020606          |
| SSE        | <b>17217.88</b> | 20354.33        | 21048.99        | 17899.89        | 18095.86          |
| ARE        | 6.522333        | <b>5.695414</b> | 5.77478         | 6.863585        | 6.385892          |
| EABS       | 499.7889        | 462.4673        | <b>459.3656</b> | 519.8633        | 493.9634          |
| HYBRID     | 220.826         | 317.0547        | 334.7828        | <b>209.9631</b> | 232.0307          |
| MPSD       | 9.070946        | 10.24994        | 10.59157        | 9.527401        | <b>8.994606</b>   |

|            |                 |                 |                 |                 |                    |
|------------|-----------------|-----------------|-----------------|-----------------|--------------------|
| <b>SNE</b> | <b>4.245697</b> | 4.601185        | 4.724993        | 4.377081        | 4.282585           |
| <b>323</b> |                 |                 |                 |                 |                    |
| $q_e$      | 855.0125        | 807.6129        | 833.6172        | 871.4969        | 834.6808222        |
| $K_L$      | 0.021036        | 0.027297        | 0.024637        | 0.018931        | 0.022168202        |
| SSE        | <b>24662.22</b> | 31237.06        | 27251.4         | 25824.18        | 26254.077          |
| ARE        | 7.679979        | <b>6.808864</b> | 7.082505        | 8.047483        | 7.564665666        |
| EABS       | 596.9301        | 571.8395        | <b>567.0843</b> | 621.0133        | 596.8528199        |
| HYBRID     | 300.5924        | 471.08          | 397.4728        | <b>282.6617</b> | 318.912204         |
| MPSD       | 10.94389        | 12.49928        | 11.65993        | 11.47366        | <b>10.84555591</b> |
| <b>SNE</b> | <b>4.218725</b> | 4.946067        | 4.619925        | 4.539262        | 4.473254048        |
| <b>333</b> |                 |                 |                 |                 |                    |
| $q_e$      | 889.2123        | 847.3478        | 857.9883        | 905.1901        | 864.2978415        |
| $K_L$      | 0.021325        | 0.02835         | 0.026483        | 0.019366        | 0.023086174        |
| SSE        | <b>19373.42</b> | 27536.94        | 24301.94        | 20383.52        | 21274.15803        |
| ARE        | 7.371104        | <b>6.464843</b> | 6.61592         | 7.674105        | 7.247359435        |
| EABS       | 530.5134        | 498.1741        | <b>493.0595</b> | 551.5           | 535.1487938        |
| HYBRID     | 258.8117        | 476.7155        | 404.7786        | <b>243.8294</b> | 289.3381489        |
| MPSD       | 11.59008        | 13.31412        | 12.47409        | 12.1481         | <b>11.43785203</b> |
| <b>SNE</b> | <b>4.039422</b> | 4.745731        | 4.424671        | 4.164125        | 4.153328708        |

**Table S5.** Error analysis of Freundlich isotherm model at four different temperatures for MB adsorption on AG.

| <b>Parameters</b> | <b>SSE</b>      | <b>ARE</b>      | <b>EABS</b>    | <b>HYBRID</b>   | <b>MPSD</b>        |
|-------------------|-----------------|-----------------|----------------|-----------------|--------------------|
| <b>303</b>        |                 |                 |                |                 |                    |
| $n$               | 2.793126        | 1.597954        | 3.07194        | 1.949771        | 1.462359499        |
| $K_F$             | 94.51226        | 22.11086        | 112.669        | 40.8784         | 16.47334329        |
| SSE               | <b>81806.33</b> | 241322.5        | 85437.3        | 143125.5        | 310030.951         |
| ARE               | 70.75273        | <b>21.23742</b> | 86.6834        | 29.03088        | 21.66460189        |
| EABS              | 1137.862        | 1831.87         | <b>1131.16</b> | 1408.778        | 2101.757356        |
| HYBRID            | 4989.446        | 2275.059        | 7472.42        | <b>1615.339</b> | 2925.871234        |
| MPSD              | 251.0863        | 29.97046        | 316.884        | 75.54127        | <b>25.25598835</b> |
| <b>SNE</b>        | 3.081546        | 2.294011        | 3.81377        | <b>1.921403</b> | 2.72118483         |
| <b>313</b>        |                 |                 |                |                 |                    |
| $n$               | 2.991297        | 1.557167        | 3.06844        | 2.03555         | 1.482338           |
| $K_F$             | 108.8469        | 20.27082        | 112.806        | 46.667          | 17.5412            |
| SSE               | <b>79604.98</b> | 298719.8        | 80384.7        | 148681.8        | 344689.4           |
| ARE               | 74.89074        | <b>23.29718</b> | 78.1694        | 29.87984        | 23.54674           |
| EABS              | 1123.275        | 2078.369        | <b>1117.56</b> | 1418.253        | 2247.521           |
| HYBRID            | 5797.732        | 2907.226        | 6325.91        | <b>1715.526</b> | 3310.953           |
| MPSD              | 283.0751        | 28.96165        | 297.482        | 85.65777        | <b>27.80122</b>    |
| <b>SNE</b>        | 3.556865        | 2.646338        | 3.73045        | <b>2.003758</b> | 2.918078           |
| <b>323</b>        |                 |                 |                |                 |                    |
| $n$               | 3.077175        | 1.643806        | 3.06911        | 2.08929         | 1.537889167        |

|            |                 |                 |                |                 |                    |
|------------|-----------------|-----------------|----------------|-----------------|--------------------|
| $K_F$      | 119.0418        | 25.38938        | 117.014        | 51.89661        | 20.76540525        |
| SSE        | <b>99895.99</b> | 315036.7        | 101080         | 174986          | 374677.6242        |
| ARE        | 69.33944        | <b>22.73679</b> | 67.9799        | 28.74965        | 23.02243688        |
| EABS       | 1252.027        | 2119.934        | <b>1245.64</b> | 1545.416        | 2334.502341        |
| HYBRID     | 5940.609        | 2864.969        | 5727.41        | <b>1878.887</b> | 3398.964704        |
| MPSD       | 253.5464        | 29.12627        | 248.507        | 77.41679        | <b>27.0159337</b>  |
| <b>SNE</b> | 3.802933        | 2.673958        | 3.72799        | <b>2.165256</b> | 3.010734936        |
| <b>333</b> |                 |                 |                |                 |                    |
| $n$        | 3.086191        | 1.677792        | 3.35669        | 2.114916        | 1.566907388        |
| $K_F$      | 124.8107        | 28.43539        | 143.008        | 55.93019        | 23.18762874        |
| SSE        | <b>96792.7</b>  | 314512.5        | 99935.1        | 173647.1        | 379063.7475        |
| ARE        | 64.02076        | <b>21.93811</b> | 74.8469        | 27.57001        | 22.23626674        |
| EABS       | 1236.979        | 2122.226        | <b>1208.73</b> | 1561.982        | 2347.214504        |
| HYBRID     | 5670.709        | 2771.09         | 7848.49        | <b>1834.666</b> | 3323.919492        |
| MPSD       | 232.0343        | 28.4162         | 278.736        | 72.78366        | <b>26.21951188</b> |
| <b>SNE</b> | 3.192676        | 2.481982        | 3.7786         | <b>1.98679</b>  | 2.814666663        |

**Table S6.** Error analysis of R-P isotherm model at four different temperatures for MB adsorption on AG

| Parameters | SSE            | ARE             | EABS     | HYBRID          | MPSD               |
|------------|----------------|-----------------|----------|-----------------|--------------------|
| <b>303</b> |                |                 |          |                 |                    |
| $g$        | 1.44683        | 0.852003        | 0.929612 | 1.390284        | 0.868743961        |
| $B$        | 0.00072        | 0.044819        | 0.056599 | 0.001046        | 0.039391975        |
| $A$        | 8.63858        | 16.20011        | 28.93531 | 9.016035        | 15.82256303        |
| SSE        | <b>2431.78</b> | 40182.46        | 53850.26 | 2616.606        | 36427.7127         |
| ARE        | 6.0892         | 7.348417        | 15.74949 | <b>5.778427</b> | 7.367660124        |
| EABS       | 181.911        | 731.7005        | 674.7607 | <b>173.1848</b> | 709.7639352        |
| HYBRID     | 14304.6        | 236367.4        | 316766.2 | 83.82291        | 214280.6629        |
| MPSD       | 15.834         | 9.718796        | 31.36686 | 15.11038        | <b>9.678423601</b> |
| <b>SNE</b> | 1.23036        | 3.268802        | 4.922182 | <b>1.13417</b>  | 3.099304603        |
| <b>313</b> |                |                 |          |                 |                    |
| $g$        | 1.35869        | 1.058133        | 1.119498 | 1.358691        | 0.89734            |
| $B$        | 0.00144        | 0.017287        | 0.008753 | 0.001443        | 0.040813           |
| $A$        | 10.0662        | 19.09989        | 14.36647 | 10.06578        | 18.73538           |
| SSE        | <b>4293.98</b> | 24338.72        | 11097.78 | 4293.979        | 29293.74           |
| ARE        | 6.61127        | <b>5.650831</b> | 6.011117 | 6.611634        | 6.643891           |
| EABS       | <b>229.537</b> | 399.8405        | 321.1165 | 229.5541        | 648.7878           |
| HYBRID     | 25258.7        | 143169          | 65281.08 | <b>25258.7</b>  | 172316.1           |
| MPSD       | 16.1855        | 12.63843        | 11.02294 | 16.18627        | <b>8.571826</b>    |
| <b>SNE</b> | <b>2.642</b>   | 3.909332        | 2.838402 | 2.642132        | 4.529574           |
| <b>323</b> |                |                 |          |                 |                    |
| $g$        | 1.41872        | 0.944763        | 1.081141 | 1.417127        | 0.856269987        |

|            |                |                 |          |                 |                    |
|------------|----------------|-----------------|----------|-----------------|--------------------|
| <i>B</i>   | 0.00102        | 0.03744         | 0.017182 | 0.001032        | 0.059823152        |
| <i>A</i>   | 10.3423        | 22.68129        | 22.07371 | 10.36138        | 22.23571651        |
| SSE        | <b>4803.71</b> | 32376.07        | 42139.69 | 4804.205        | 48592.82589        |
| ARE        | 7.03242        | <b>6.984165</b> | 7.33145  | 7.021219        | 7.74952526         |
| EABS       | 239.461        | 651.584         | 501.4692 | <b>239.1724</b> | 817.3915743        |
| HYBRID     | <b>28257.1</b> | 190447.5        | 247880.5 | 28260.03        | 285840.1523        |
| MPSD       | 17.9904        | 11.74353        | 16.68187 | 17.96168        | <b>10.01038816</b> |
| SNE        | 2.39814        | 3.6837          | 4.221216 | <b>2.394761</b> | 4.556429749        |
| <b>333</b> |                |                 |          |                 |                    |
| <i>g</i>   | 1.34612        | 0.908936        | 0.814224 | 1.34663         | 0.830063478        |
| <i>B</i>   | 0.00167        | 0.050375        | 0.09012  | 0.001667        | 0.07639992         |
| <i>A</i>   | 11.5208        | 25.60584        | 27.39183 | 11.51479        | 25.35904624        |
| SSE        | <b>3292.91</b> | 31431.22        | 51140.58 | 3292.913        | 48848.88437        |
| ARE        | 6.15785        | 6.696776        | 7.434895 | <b>6.157435</b> | 7.786572445        |
| EABS       | 165.852        | 649.3918        | 854.6108 | <b>165.7566</b> | 841.4419399        |
| HYBRID     | <b>19370.1</b> | 184889.5        | 300826.9 | 19370.08        | 287346.3787        |
| MPSD       | 17.8393        | 11.42709        | 10.36925 | 17.84705        | <b>10.1535249</b>  |
| SNE        | <b>2.11324</b> | 3.489397        | 4.535842 | 2.113511        | 4.463886497        |

**Table S7.** Error analysis of Toth isotherm model at four different temperatures for MB adsorption on AG.

| Parameters | SSE             | ARE             | EABS            | HYBRID          | MPSD            |
|------------|-----------------|-----------------|-----------------|-----------------|-----------------|
| <b>303</b> |                 |                 |                 |                 |                 |
| $q_{max}$  | 736.7064        | 858.8074        | 711.9343        | 736.7064        | 845.5942807     |
| $n_T$      | 1.604449        | 0.953368        | 1.970931        | 1.604449        | 0.977921341     |
| $K_T$      | 0.020258        | 0.016462        | 0.020414        | 0.020258        | 0.017256164     |
| SSE        | <b>7548.715</b> | 20909.2         | 10159.38        | 7548.715        | 19795.47795     |
| ARE        | 11.54109        | <b>6.201768</b> | 12.55593        | 11.54109        | 6.383362939     |
| EABS       | 310.2133        | 534.702         | <b>259.3109</b> | 310.2133        | 513.1838542     |
| HYBRID     | 44404.2         | 122995.3        | 59761.05        | <b>44404.2</b>  | 116443.988      |
| MPSD       | 101.121         | <b>98.56942</b> | 101.2192        | 101.121         | 98.56999712     |
| SNE        | <b>3.220413</b> | 4.467753        | 3.456725        | <b>3.220413</b> | 4.335448617     |
| <b>313</b> |                 |                 |                 |                 |                 |
| $q_{max}$  | 744.8814        | 818.355         | 755.7915        | 744.8814        | 818.4333        |
| $n_T$      | 1.474588        | 0.98046         | 1.272532        | 1.474588        | 0.98297         |
| $K_T$      | 0.022521        | 0.021249        | 0.024062        | 0.022521        | 0.021217        |
| SSE        | <b>10241.07</b> | 18758.88        | 12445.33        | 10241.07        | 18594.54        |
| ARE        | 11.07293        | <b>5.723082</b> | 9.597539        | 11.07293        | 5.768101        |
| EABS       | 345.7378        | 489.0025        | 369.1215        | <b>345.7378</b> | 488.4367        |
| HYBRID     | 60241.6         | 110346.3        | 73207.84        | <b>60241.6</b>  | 109379.6        |
| MPSD       | 105.0906        | 102.3927        | 104.3704        | 105.0906        | <b>102.3927</b> |
| SNE        | <b>3.798891</b> | 4.491181        | 3.941624        | <b>3.798891</b> | 4.476569        |

|            |                 |                 |                 |                 |             |
|------------|-----------------|-----------------|-----------------|-----------------|-------------|
| $q_{max}$  | 758.9554        | 838.0697        | 739.9011        | 758.9554        | 837.2281387 |
| $n_T$      | 1.597843        | 0.965954        | 1.670484        | 1.597843        | 0.979057657 |
| $K_T$      | 0.023547        | 0.023695        | 0.027946        | 0.023547        | 0.023638644 |
| SSE        | <b>13633.78</b> | 28123.16        | 20270.46        | 13633.78        | 27182.85329 |
| ARE        | 11.98523        | <b>6.369412</b> | 11.81512        | 11.98523        | 6.729847515 |
| EABS       | 411.443         | 585.3742        | <b>389.7503</b> | 411.443         | 581.6160077 |
| HYBRID     | 80198.73        | 165430.4        | 119238          | <b>80198.73</b> | 159899.137  |
| MPSD       | 114.9696        | <b>111.7219</b> | 116.8975        | 114.9696        | 111.77      |
| <b>SNE</b> | <b>3.655956</b> | 4.487163        | 4.09317         | <b>3.655956</b> | 4.444357252 |
| <b>333</b> |                 |                 |                 |                 |             |
| $q_{max}$  | 795.4698        | 873.0415        | 769.977         | 795.4698        | 858.4179843 |
| $n_T$      | 1.526445        | 0.957684        | 1.965562        | 1.526445        | 0.988234696 |
| $K_T$      | 0.023959        | 0.024914        | 0.02275         | 0.023959        | 0.025747524 |
| SSE        | <b>9918.033</b> | 24442.27        | 14667.51        | 9918.033        | 23614.6575  |
| ARE        | 10.62061        | <b>5.774436</b> | 12.02911        | 10.62061        | 6.506572682 |
| EABS       | 325.3202        | 515.2066        | <b>279.9498</b> | 325.3202        | 509.851013  |
| HYBRID     | 58341.37        | 143778          | 86279.44        | <b>58341.37</b> | 138909.75   |
| MPSD       | 206.853         | <b>203.5973</b> | 209.7743        | 206.853         | 203.8       |
| <b>SNE</b> | <b>3.311967</b> | 4.450593        | 3.743549        | <b>3.311967</b> | 4.434308315 |

**Table S8.** Error analysis of Sips isotherm model at four different temperatures for MB adsorption on AG.

| Parameters | SSE            | ARE            | EABS           | HYBRID          | MPSD           |
|------------|----------------|----------------|----------------|-----------------|----------------|
| <b>303</b> |                |                |                |                 |                |
| $q_{max}$  | 832.965        | 934.086        | 818.451        | 832.9653        | 934.086        |
| $1/n$      | 1.00415        | 1.00415        | 1.00415        | 1.004148        | 1.00415        |
| $K_s$      | 0.01815        | 0.01186        | 0.01917        | 0.018148        | 0.01186        |
| SSE        | <b>19700.8</b> | 29547.4        | 19857.5        | 19700.75        | 29547.3        |
| ARE        | 6.55676        | <b>5.95835</b> | 6.76151        | 6.556762        | 5.95835        |
| EABS       | 502.579        | 622.539        | <b>491.252</b> | 502.5785        | 622.539        |
| HYBRID     | 115887         | 173808         | 116809         | <b>115886.8</b> | 173808         |
| MPSD       | 10.7853        | 7.92716        | 11.4935        | 10.78528        | <b>7.92716</b> |
| <b>SNE</b> | <b>4.04891</b> | 4.57092        | 4.13323        | <b>4.048908</b> | 4.57092        |
| <b>313</b> |                |                |                |                 |                |
| $q_{max}$  | 821.567        | 809.665        | 783.699        | 821.5669        | 862.058        |
| $1/n$      | 1.00892        | 1.00892        | 1.00892        | 1.008921        | 1.00892        |
| $K_s$      | 0.02097        | 0.02331        | 0.02606        | 0.020969        | 0.01675        |
| SSE        | <b>18425.5</b> | 19964.5        | 21881.8        | 18425.48        | 22265.1        |
| ARE        | 5.7801         | <b>5.72443</b> | 6.45235        | 5.780098        | 6.01187        |
| EABS       | 490.547        | 467.843        | <b>452.067</b> | 490.5469        | 551.725        |
| HYBRID     | 108385         | 117438         | 128716         | <b>108385.2</b> | 130971         |
| MPSD       | 9.03993        | 10.4353        | 11.828         | 9.039933        | <b>8.00852</b> |
| <b>SNE</b> | <b>4.20432</b> | 4.41075        | 4.78494        | <b>4.204315</b> | 4.60882        |

|            |                |                |                |                 |                |
|------------|----------------|----------------|----------------|-----------------|----------------|
| $q_{max}$  | 844.091        | 850.106        | 817.169        | 844.091         | 909.026        |
| $1/n$      | 1.00993        | 1.00993        | 1.00993        | 1.009932        | 1.00993        |
| $K_s$      | 0.02259        | 0.02297        | 0.02634        | 0.022592        | 0.0162         |
| SSE        | <b>26978.9</b> | 27562.4        | 28807.5        | 26978.88        | 34851.1        |
| ARE        | 6.68931        | <b>6.38612</b> | 7.08373        | 6.689311        | 6.65725        |
| EABS       | 592.368        | 588.608        | <b>560.959</b> | 592.3678        | 679.817        |
| HYBRID     | 158699         | 162132         | 169456         | <b>158699.3</b> | 205006         |
| MPSD       | 10.606         | 11.1305        | 12.6309        | 10.60598        | <b>8.79076</b> |
| <b>SNE</b> | <b>4.2036</b>  | 4.23029        | 4.47834        | <b>4.203604</b> | 4.63576        |

---

|            |                |                |                |               |                |
|------------|----------------|----------------|----------------|---------------|----------------|
| $q_{max}$  | 884.205        | 880.626        | 855.44         | 884.2045      | 956.073        |
| $1/n$      | 0.99938        | 0.99938        | 0.99938        | 0.999378      | 0.99938        |
| $K_s$      | 0.02257        | 0.02484        | 0.02714        | 0.022572      | 0.01597        |
| SSE        | <b>22348.7</b> | 25136.6        | 25793          | 22348.7       | 30792.2        |
| ARE        | 6.15687        | <b>5.78582</b> | 6.37692        | 6.156882      | 6.43141        |
| EABS       | 538.366        | 512.26         | <b>495.348</b> | 538.3666      | 661.758        |
| HYBRID     | 131463         | 147862         | 151724         | <b>131463</b> | 181131         |
| MPSD       | 10.5101        | 12.2643        | 13.0707        | 10.5101       | <b>8.66173</b> |
| <b>SNE</b> | <b>4.02653</b> | 4.24467        | 4.41536        | 4.026529      | 4.66268        |

## References

56. Bradder, P.; Ling, S.K.; Wang, S.; Liu, S. Dye Adsorption on Layered Graphite Oxide. *Journal of Chemical & Engineering Data* 2011, 56, 138-141, doi:10.1021/je101049g.
57. Mao, B.; Sidhureddy, B.; Thiruppathi, A.R.; Wood, P.C.; Chen, A. Efficient dye removal and separation based on graphene oxide nanomaterials. *New Journal of Chemistry* 2020, 44, 4519-4528, doi:10.1039/C9NJ05895H.
58. Li, Y.; Du, Q.; Liu, T.; Peng, X.; Wang, J.; Sun, J.; Wang, Y.; Wu, S.; Wang, Z.; Xia, Y.; et al. Comparative study of methylene blue dye adsorption onto activated carbon, graphene oxide, and carbon nanotubes. *Chemical Engineering Research and Design* 2013, 91, 361-368, doi:https://doi.org/10.1016/j.cherd.2012.07.007.
59. Tu, T.H.; Cam, P.T.N.; Huy, L.V.T.; Phong, M.T.; Nam, H.M.; Hieu, N.H. Synthesis and application of graphene oxide aerogel as an adsorbent for removal of dyes from water. *Materials Letters* 2019, 238, 134-137, doi:https://doi.org/10.1016/j.matlet.2018.11.164.
60. Liu, F.; Chung, S.; Oh, G.; Seo, T.S. Three-Dimensional Graphene Oxide Nanostructure for Fast and Efficient Water-Soluble Dye Removal. *ACS Applied Materials & Interfaces* 2012, 4, 922-927, doi:10.1021/am201590z.
61. Tiwari, J.N.; Mahesh, K.; Le, N.H.; Kemp, K.C.; Timilsina, R.; Tiwari, R.N.; Kim, K.S. Reduced graphene oxide-based hydrogels for the efficient capture of dye pollutants from aqueous solutions. *Carbon* 2013, 56, 173-182, doi:https://doi.org/10.1016/j.carbon.2013.01.001.
62. Liu, T.; Li, Y.; Du, Q.; Sun, J.; Jiao, Y.; Yang, G.; Wang, Z.; Xia, Y.; Zhang, W.; Wang, K.; et al. Adsorption of methylene blue from aqueous solution by graphene. *Colloids and Surfaces B: Biointerfaces* 2012, 90, 197-203, doi:https://doi.org/10.1016/j.colsurfb.2011.10.019.
63. Gupta, K.; Khatri, O.P. Reduced graphene oxide as an effective adsorbent for removal of malachite green dye: Plausible adsorption pathways. *Journal of Colloid and Interface Science* 2017, 501, 11-21, doi:https://doi.org/10.1016/j.jcis.2017.04.035.
64. Yang, S.-T.; Chen, S.; Chang, Y.; Cao, A.; Liu, Y.; Wang, H. Removal of methylene blue from aqueous solution by graphene oxide. *Journal of Colloid and Interface Science* 2011, 359, 24-29, doi:https://doi.org/10.1016/j.jcis.2011.02.064.

65. Tabish, T.A.; Memon, F.A.; Gomez, D.E.; Horsell, D.W.; Zhang, S. A facile synthesis of porous graphene for efficient water and wastewater treatment. *Scientific Reports* 2018, 8, 1817, doi:10.1038/s41598-018-19978-8.
